# Supplementary material for: Within-host evolution of SARS-CoV-2 in an immunosuppressed COVID-19 patient as a source of immune escape variants
Source: PubMed Central journal article supplement (PMC8568958; doi:10.1038/s41467-021-26602-3), 2021-11-04
Supplement: 41467_2021_26602_MOESM1_ESM.pdf [file 41467_2021_26602_MOESM1_ESM.pdf]

## **Supplementary Information**

### **Within-host evolution of SARS-CoV-2 in an immunosuppressed COVID-19 patient as a source of immune escape variants**

Sebastian Weigang, Jonas Fuchs, Gert Zimmer, Daniel Schnepf, Lisa Kern, Julius Beer, Hendrik Luxenburger, Jakob Ankerhold, Valeria Falcone, Janine Kemming, Maike Hofmann, Robert Thimme, Christoph Neumann-Haefelin, Svenja Ulferts, Robert Grosse, Daniel Hornuss, Yakup Tanriver, Siegbert Rieg, Dirk Wagner, Daniela Huzly, Martin Schwemmler, Marcus Panning

a

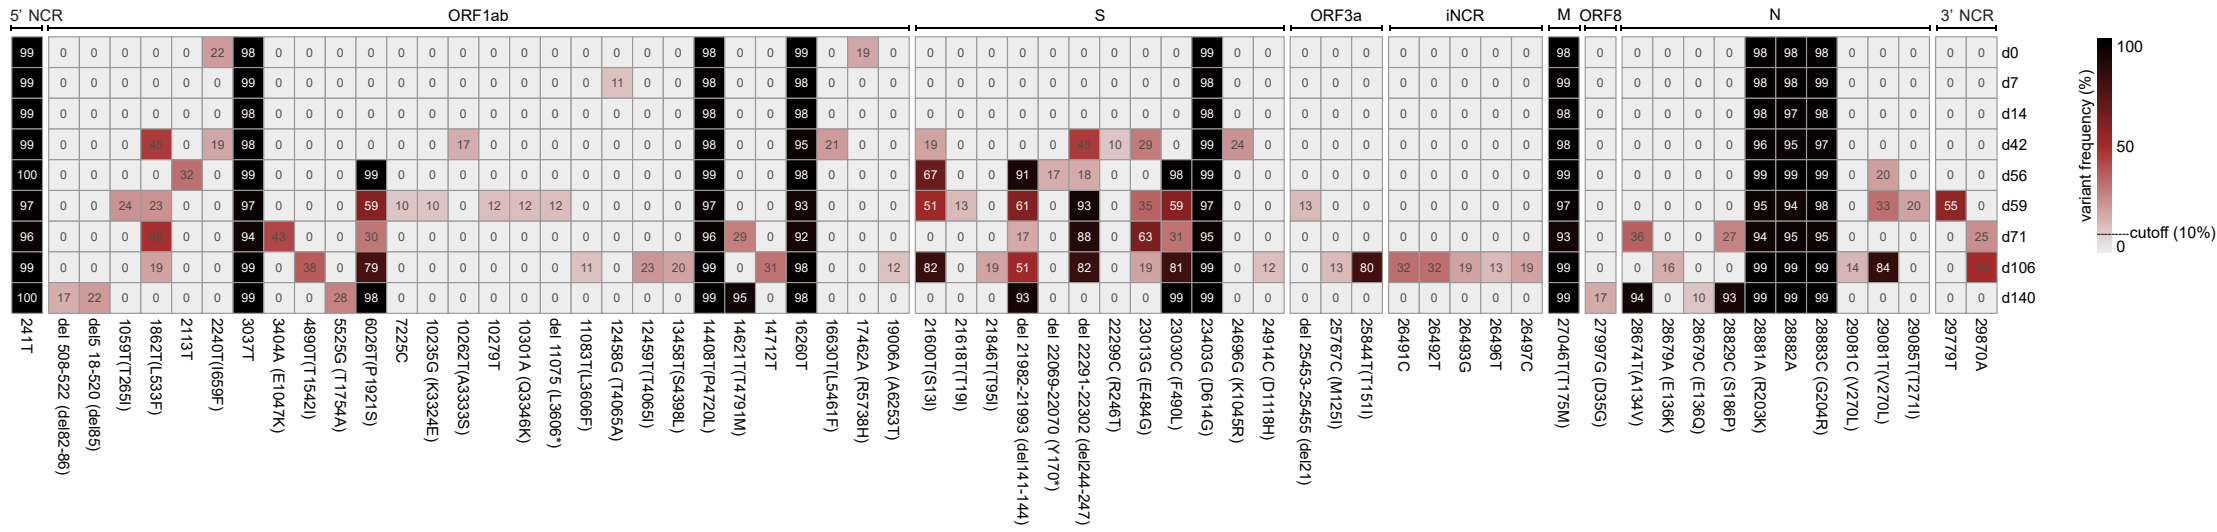

**Supplementary Figure 1: SARS-CoV-2 whole genome sequence and analysis of viral genomes.** Overview of the viral genome variations as shown in figure 2c from patient swab samples (day 0-140) in comparison to the Wuhan-Hu-1 reference sequence. The heatmap summarizes the positions in the viral genome and the variant frequencies in the different samples using a cut off value of 10%. The variant frequencies are indicated by the numbers in the boxes and by the color intensity at the right. The days of sampling are indicated at the right.

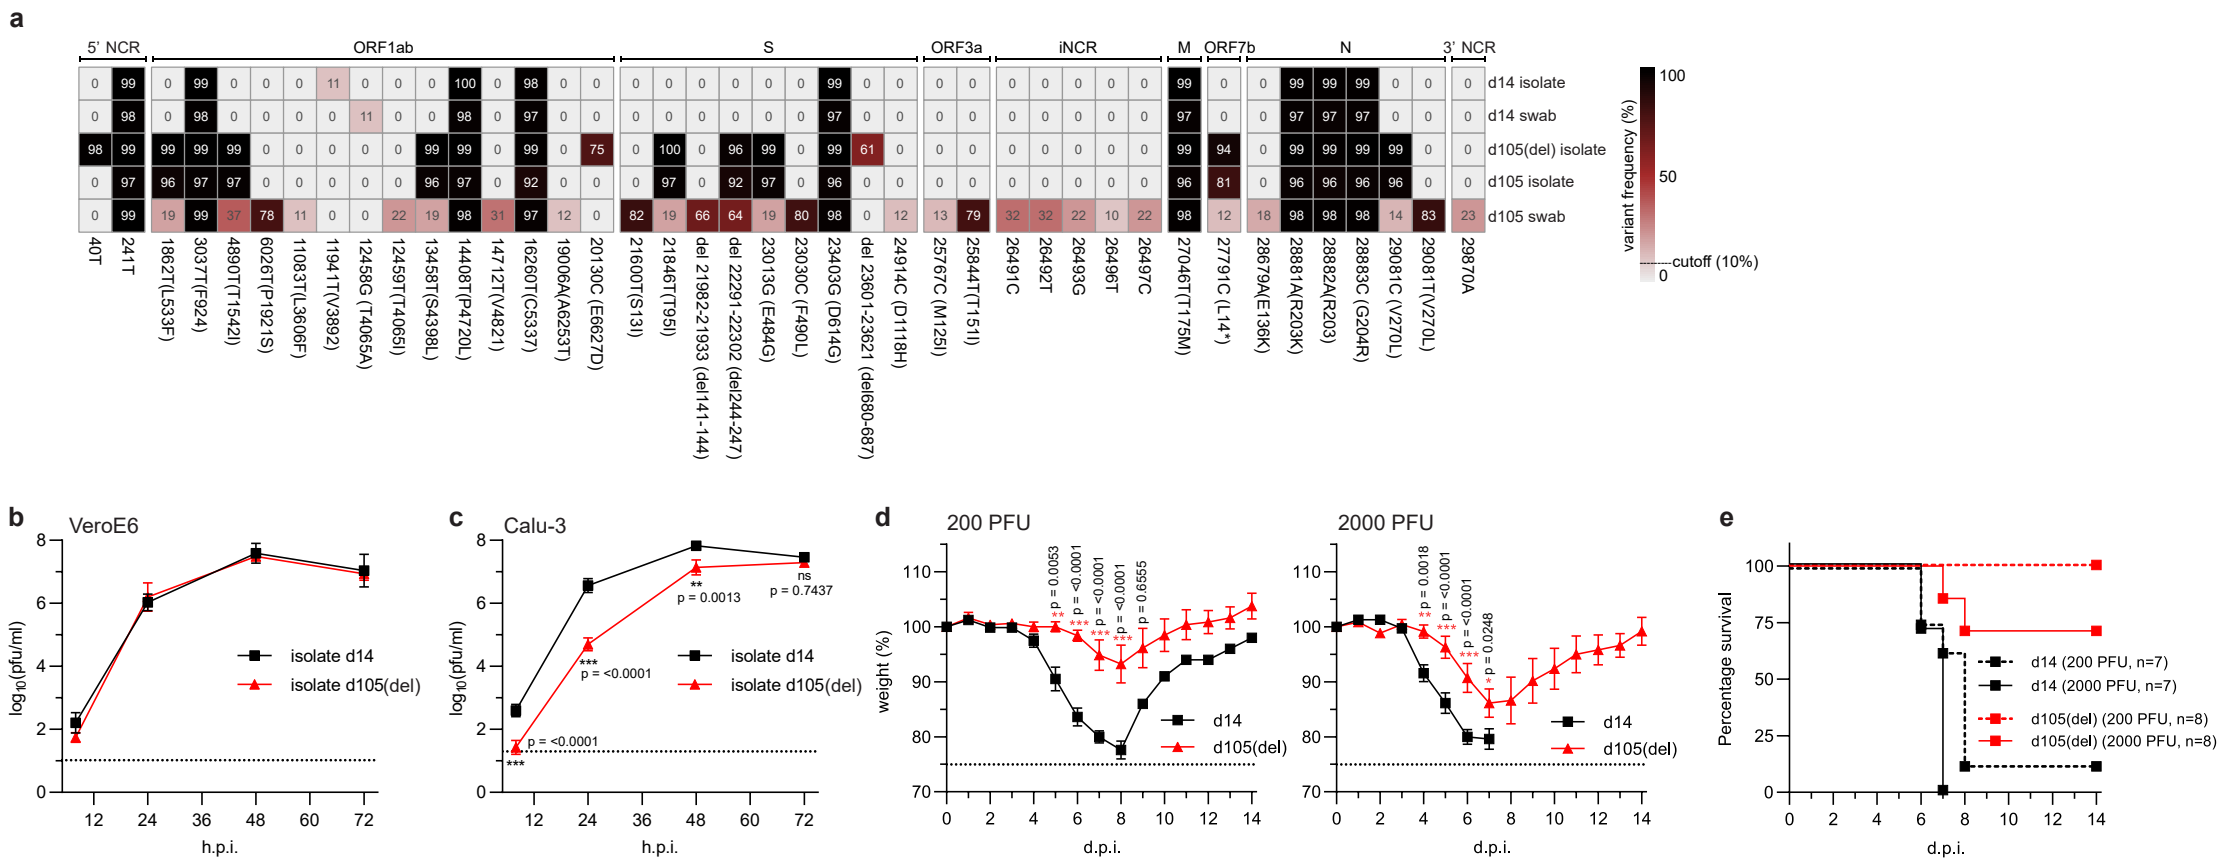

**Supplementary Figure 2: Growth characteristics of the SARS-CoV-2 d105(del) variant.** (a) Viral genome variations as shown in figure 4a from patient early (d14) or late (d105) swab samples and isolated viruses in comparison to the Wuhan-Hu-1 reference sequence. Variant d105(del) represents an early virus stock from VeroE6 cells with a 21 nucleotides deletion (del23601-23621) in 50% of the spike gene sequences, resulting in an eight amino acids SPRRARSV deletion. The heatmap summarizes the positions in the viral genome using a cut off values of 10%. The variant frequencies are indicated by the numbers in the boxes and by the color intensity at the right. (b) Vero E6 and (c) Calu-3 cells were infected with either of the two variants, d14 or d105(del), using 0.001 pfu/cell. At different time points post infection, cell culture supernatants were collected and viral titers were determined. The log-transformed titers are shown as means  $\pm$  SD of results from three independent experiments. Significance was determined via two-way ANOVA with a Sidak's multiple comparison test, \*\* $p < 0.01$ , \*\*\* $p < 0.001$ , ns=non significant. The exact p-values are given in the figure. (d and e) *In vivo* infection experiments. Survival of 8 to 12 weeks-old K18-hACE2 mice intranasally infected with 200 or 2000 pfu of d14 ( $n=7$ , each) or d105(del) ( $n=8$ , each) viruses. The animals were euthanized if severe symptoms were observed or body weight loss exceeded 25 % of the initial weight. The weight loss is visualized as mean  $\pm$  SEM. Significance was determined via two-way ANOVA with a Sidak's multiple comparison test, \* $p < 0.1$ , \*\* $p < 0.01$ , \*\*\* $p < 0.001$ . The exact p values are visualized in the figure. Source data are provided as a Source Data file.

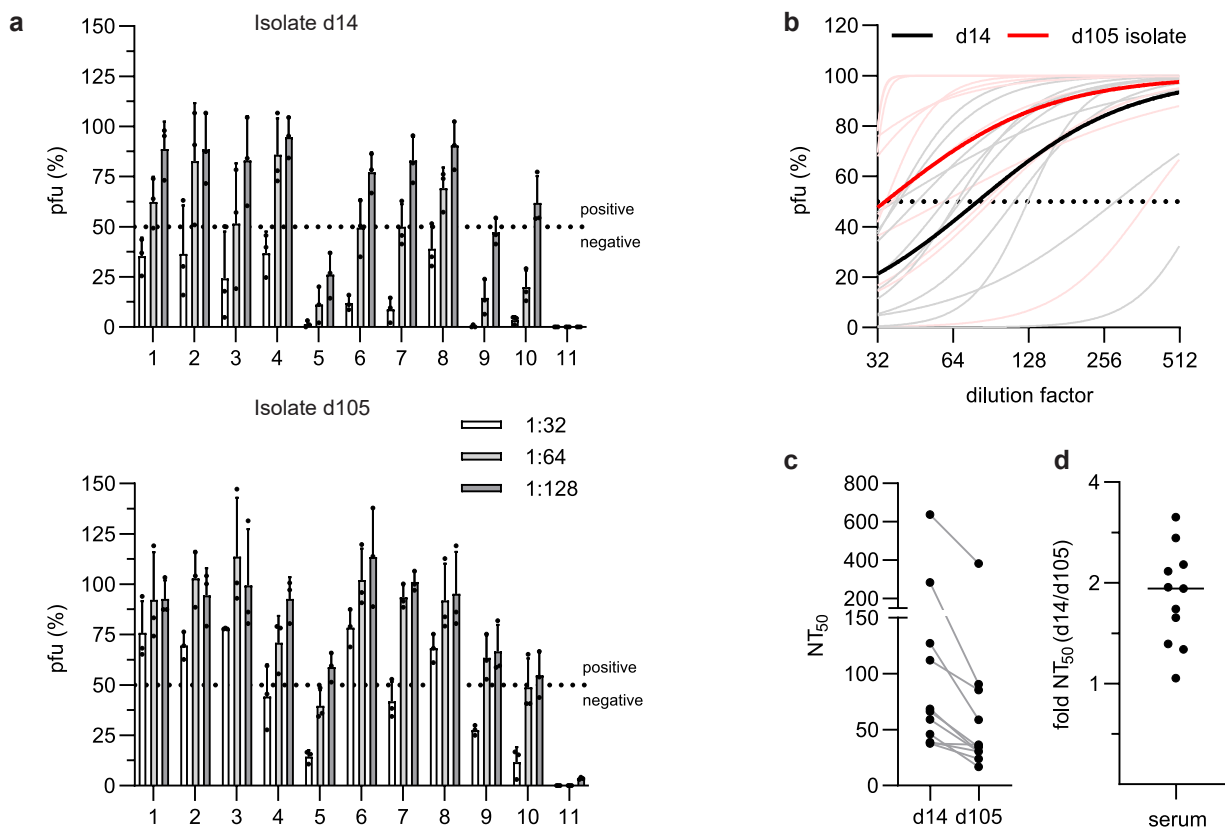

**Supplementary Figure 3: Isolate d105 escapes neutralization by COVID-19 specific antisera like d105(del).** (a) Neutralizing activity of immune sera against the patient's isolates. Sera 1 to 10 from convalescent COVID-19 patients and serum 11 from an individual after a SARS-CoV-2 infection and a following AstraZeneca-Vaxzevria vaccination. 100 pfu of d14 and Calu3-propagated d105 isolate without a deletion in the furin cleavage site were incubated for 60 min at room temperature with serial dilutions of the antisera. Virus neutralization was determined by plaque assay on VeroE6 cells. Virus titers are indicated as percentages (mean  $\pm$ SD) of the titer of the untreated virus inoculum for the serum dilutions 1:32, 1:64 and 1:128. The dotted line indicates the cutoff value between positive (<50%) and negative (>50%) neutralization. Shown are the means of three biological replicates. (b) Curves for the calculation of the NT<sub>50</sub> values via a non-linear regression of a broader range of antiserum dilutions (variable slope, four parameters). Shown are means (n=3) of three biological replicates. The results for each serum are presented in light red (d14) and light black (d105) and the mean values for all 11 sera are visualized in dark black and dark red for the d14 and d105 variants, respectively. (c) Visualization of the NT<sub>50</sub> values determined from the data shown in panel b. The NT<sub>50</sub> values for the two variants are connected for each serum. (d) The fold differences in NT<sub>50</sub> between d14 and d105 were calculated for each individual antiserum using the values given in panel c. Source data are provided as a Source Data file.

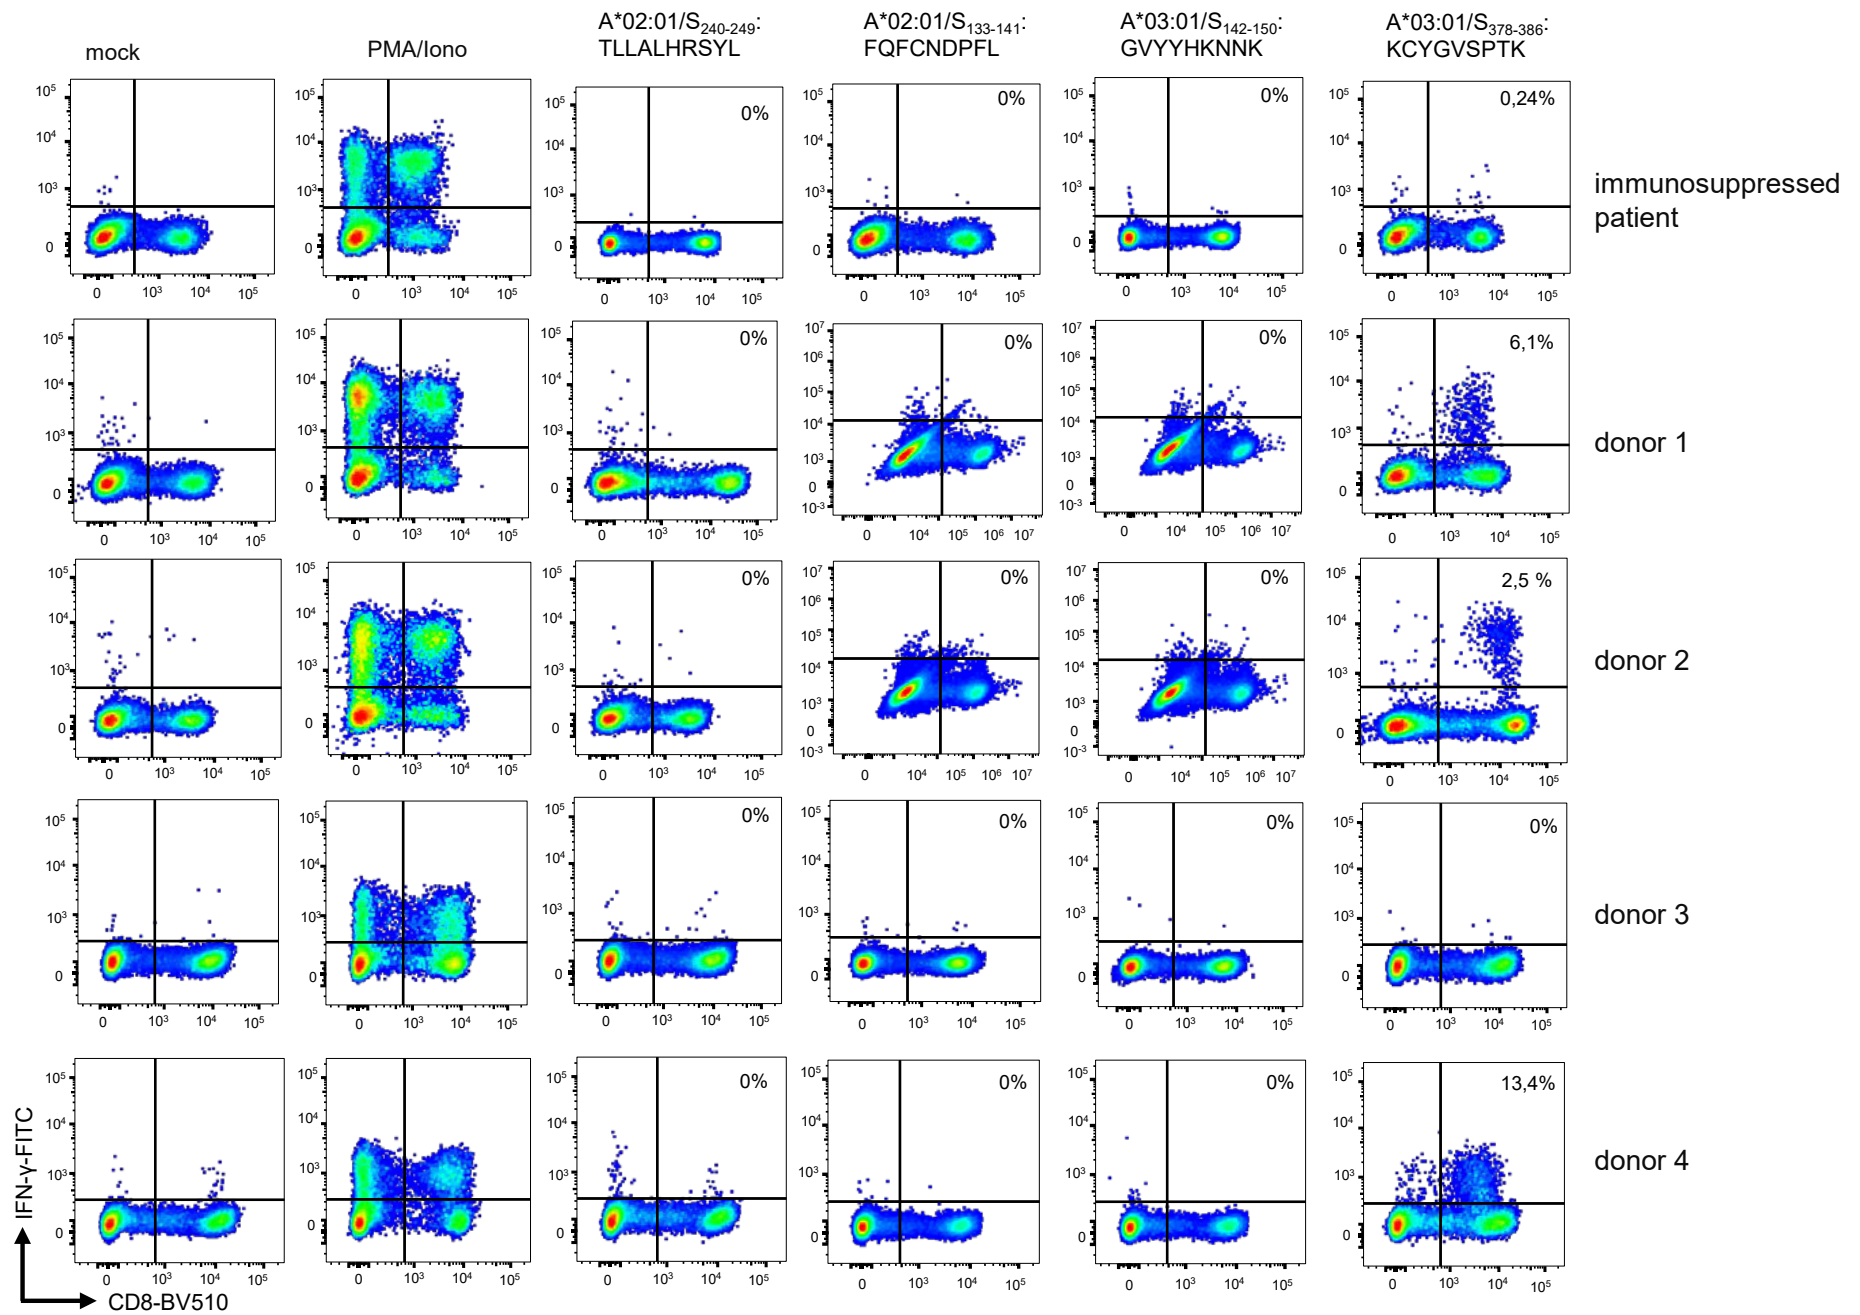

**Supplementary Figure 4: Lack of detectable CD8+ T cell responses targeting the mutated regions in the spike protein.** HLA-A\*02:01/HLA-A\*03:01-restricted CD8+ T cell epitopes overlapping with the del141-144 and the del244-247 deletions as well as a control peptide 378-386 in the S1 domain were predicted *in silico*. Peptide-specific CD8+ T cell responses were assessed by intra-cellular IFN production following a 14-day *in vitro* peptide-specific CD8+ T cell expansion. CD8+ T cells targeting the *in silico*-predicted SARS-CoV-2 S1-specific, HLA-A\*02:01/HLA-A\*03:01-restricted CD8+ T cell epitopes were neither detectable in the convalescent, immunosuppressed COVID-19 patient (upper panel) nor in four additional HLA-A\*02:01/HLA-A\*03:01 positive convalescent, immunocompetent COVID-19 patients (donor 1 to 4). CD8+ T cell responses targeting the immunodominant A\*03:01/S<sub>378-386</sub> epitope are depicted as positive control, as well as mock-stimulated and PMA/Ionomycin-stimulated cells.

**Supplementary Table 1:** Days according to the first positive qPCR test and respective clinical parameters.

| Day | Ct | SARS-S1 | SARSMIK-N | Virus isolation | NT (dilution factor) |
|-----|----|---------|-----------|-----------------|----------------------|
| -3  |    | 0.068   | 3.35      |                 |                      |
| -2  |    | 0.07    | 3.44      |                 |                      |
| 0   | 25 | 0.07    | 3.61      | negative        |                      |
| 6   | 16 |         |           | positive        |                      |
| 8   |    | 0.073   | 3.26      |                 |                      |
| 9   |    | 0.065   | 4.23      |                 |                      |
| 10  | 19 | 0.075   | 10.9      | positive        |                      |
| 12  |    | 0.119   | 27.9      |                 |                      |
| 13  |    | 0.095   | 46.5      |                 | 0                    |
| 14  | 19 |         |           | positive        |                      |
| 16  | 25 | 0.184   | 77        | negative        |                      |
| 17  |    | 0.286   | 74.1      |                 |                      |
| 19  |    | 0.332   | 85.5      |                 |                      |
| 20  |    | 0.434   | 82.4      |                 | 0                    |
| 21  | 23 |         |           | positive        |                      |
| 23  |    | 0.599   | 96.6      |                 |                      |
| 24  | 18 |         |           | positive        |                      |
| 25  |    | 0.561   | 98.1      |                 |                      |
| 27  | 26 |         |           | positive        |                      |
| 28  |    | 0.496   | 93.6      |                 |                      |
| 29  |    | 0.685   | 102       |                 |                      |
| 31  | 20 |         |           | positive        |                      |
| 32  |    | 0.735   | 99.5      |                 |                      |
| 34  | 17 |         |           | positive        |                      |
| 37  |    | 0.659   | 89.4      |                 |                      |
| 38  | 31 |         |           | negative        |                      |
| 41  |    | 0.902   | 90.6      |                 | 0                    |
| 41  |    | 0.902   | 90.6      |                 |                      |
| 42  | 27 |         |           | negative        |                      |
| 43  |    | 0.782   | 115       |                 | 0                    |
| 44  |    | 0.846   | 117       |                 |                      |
| 45  | 27 | 0.807   | 101       | negative        |                      |
| 46  | 50 |         |           |                 |                      |
| 49  | 27 | 0.878   | 107       | negative        | 0                    |
| 50  |    | 0.882   | 109       |                 |                      |
| 52  | 28 | 0.841   | 113       | negative        |                      |
| 53  |    | 0.986   | 125       |                 |                      |
| 56  | 25 | 1.05    | 118       | negative        |                      |
| 57  |    | 1.01    | 125       |                 |                      |
| 58  | 28 | 0.83    | 117       | negative        |                      |
| 60  |    | 0.878   | 111       |                 |                      |
| 63  | 27 | 0.939   | 106       | negative        |                      |
| 65  | 29 | 0.846   | 113       | negative        |                      |
| 66  |    | 1.01    | 123       |                 |                      |
| 67  |    | 0.889   | 138       |                 | 0                    |
| 71  | 30 | 0.966   | 120       | negative        |                      |
| 72  |    | 0.984   | 113       |                 | 0                    |
| 105 | 23 |         |           | positive        |                      |
| 106 |    |         |           | negative        |                      |
| 113 | 34 |         |           | negative        |                      |
| 115 | 29 |         |           | negative        |                      |
| 119 | 31 |         |           | negative        |                      |
| 122 | 31 |         |           |                 |                      |
| 123 |    | 0.872   | 109       |                 | 0                    |
| 126 | 36 |         |           |                 |                      |
| 140 | 26 |         |           | negative        |                      |
| 141 |    | 5.61    | 108       |                 | 64                   |
| 143 | 29 | 5.68    |           |                 | 64                   |
| 145 | 34 |         |           |                 |                      |
| 146 | 39 |         |           |                 |                      |
| 147 |    | 6.13    | 95.6      |                 | 64                   |
| 149 | 45 |         |           |                 |                      |
| 150 | 45 |         |           |                 | 64                   |
| 154 | 34 |         |           | negative        |                      |
| 161 | 45 | 3.4     | 104       |                 | 64                   |
| 167 | 45 |         |           |                 |                      |
| 174 | 45 |         |           |                 |                      |
| 175 |    | 5.84    | 84.2      |                 | 64                   |
| 184 |    |         |           |                 | 64                   |
| 189 | 45 |         |           |                 |                      |

**Supplementary Table 2: List of GISAID accession numbers of sequences from Freiburg.**

| GISAID Accession | Metadata                | GISAID Accession | Metadata                | GISAID Accession | Metadata                           |
|------------------|-------------------------|------------------|-------------------------|------------------|------------------------------------|
| EPI_ISL_852733   | Freiburg area           | EPI_ISL_852720   | Medical center Freiburg | EPI_ISL_852708   | Freiburg area                      |
| EPI_ISL_852729   | Freiburg area           | EPI_ISL_852719   | Medical center Freiburg | EPI_ISL_852707   | Medical center Freiburg            |
| EPI_ISL_852727   | Medical center Freiburg | EPI_ISL_852718   | Medical center Freiburg | EPI_ISL_852706   | Freiburg area                      |
| EPI_ISL_852693   | Freiburg area           | EPI_ISL_852717   | Freiburg area           | EPI_ISL_852705   | Freiburg area                      |
| EPI_ISL_852772   | Medical center Freiburg | EPI_ISL_852771   | Freiburg area           | EPI_ISL_852704   | Freiburg area                      |
| EPI_ISL_852784   | Medical center Freiburg | EPI_ISL_852716   | Medical center Freiburg | EPI_ISL_852703   | Freiburg area                      |
| EPI_ISL_852781   | Medical center Freiburg | EPI_ISL_852715   | Medical center Freiburg | EPI_ISL_852702   | Freiburg area                      |
| EPI_ISL_852778   | Medical center Freiburg | EPI_ISL_852714   | Freiburg area           | EPI_ISL_852700   | Freiburg area                      |
| EPI_ISL_852775   | Medical center Freiburg | EPI_ISL_852713   | Medical center Freiburg | EPI_ISL_852699   | Freiburg area                      |
| EPI_ISL_852701   | Medical center Freiburg | EPI_ISL_852712   | Medical center Freiburg | EPI_ISL_852698   | Medical center Freiburg            |
| EPI_ISL_852765   | Medical center Freiburg | EPI_ISL_852711   | Medical center Freiburg | EPI_ISL_852697   | Freiburg area                      |
| EPI_ISL_852792   | Medical center Freiburg | EPI_ISL_852748   | Medical center Freiburg | EPI_ISL_852696   | Freiburg area                      |
| EPI_ISL_852773   | Medical center Freiburg | EPI_ISL_852802   | Medical center Freiburg | EPI_ISL_852695   | Medical center Freiburg            |
| EPI_ISL_852744   | Freiburg area           | EPI_ISL_852804   | Freiburg area           | EPI_ISL_852694   | Freiburg area                      |
| EPI_ISL_852743   | Freiburg area           | EPI_ISL_852737   | Freiburg area           | EPI_ISL_852692   | Freiburg area                      |
| EPI_ISL_852741   | Medical center Freiburg | EPI_ISL_852801   | Medical center Freiburg | EPI_ISL_852691   | Medical center Freiburg            |
| EPI_ISL_852738   | Freiburg area           | EPI_ISL_852785   | Medical center Freiburg | EPI_ISL_852690   | Medical center Freiburg            |
| EPI_ISL_852731   | Freiburg area           | EPI_ISL_852786   | Medical center Freiburg | EPI_ISL_852769   | Medical center Freiburg            |
| EPI_ISL_852723   | Freiburg area           | EPI_ISL_852783   | Medical center Freiburg | EPI_ISL_852689   | Freiburg area                      |
| EPI_ISL_852710   | Medical center Freiburg | EPI_ISL_852800   | Medical center Freiburg | EPI_ISL_852688   | Medical center Freiburg            |
| EPI_ISL_852811   | Freiburg area           | EPI_ISL_852799   | Medical center Freiburg | EPI_ISL_852687   | Freiburg area                      |
| EPI_ISL_852732   | Medical center Freiburg | EPI_ISL_852795   | Medical center Freiburg | EPI_ISL_852686   | Medical center Freiburg            |
| EPI_ISL_852782   | Medical center Freiburg | EPI_ISL_852790   | Medical center Freiburg | EPI_ISL_852685   | Freiburg area                      |
| EPI_ISL_852759   | Medical center Freiburg | EPI_ISL_852774   | Medical center Freiburg | EPI_ISL_852684   | Medical center Freiburg            |
| EPI_ISL_852758   | Medical center Freiburg | EPI_ISL_852770   | Medical center Freiburg | EPI_ISL_852683   | Freiburg area                      |
| EPI_ISL_852812   | Freiburg area           | EPI_ISL_852779   | Medical center Freiburg | EPI_ISL_852682   | Medical center Freiburg            |
| EPI_ISL_852755   | Medical center Freiburg | EPI_ISL_852668   | Medical center Freiburg | EPI_ISL_852810   | Medical center Freiburg            |
| EPI_ISL_852754   | Medical center Freiburg | EPI_ISL_852798   | Medical center Freiburg | EPI_ISL_852681   | Medical center Freiburg            |
| EPI_ISL_852749   | Freiburg area           | EPI_ISL_852797   | Medical center Freiburg | EPI_ISL_852680   | Medical center Freiburg            |
| EPI_ISL_852747   | Freiburg area           | EPI_ISL_852796   | Medical center Freiburg | EPI_ISL_852679   | Medical center Freiburg            |
| EPI_ISL_852746   | Freiburg area           | EPI_ISL_852793   | Medical center Freiburg | EPI_ISL_852678   | Freiburg area                      |
| EPI_ISL_852745   | Freiburg area           | EPI_ISL_852788   | Medical center Freiburg | EPI_ISL_852677   | Freiburg area                      |
| EPI_ISL_852742   | Freiburg area           | EPI_ISL_852760   | Freiburg area           | EPI_ISL_852676   | Freiburg area                      |
| EPI_ISL_852803   | Medical center Freiburg | EPI_ISL_852757   | Freiburg area           | EPI_ISL_852806   | Immunosuppressed patient (day 140) |
| EPI_ISL_852740   | Freiburg area           | EPI_ISL_852756   | Freiburg area           | EPI_ISL_852809   | Immunosuppressed patient (day 56)  |
| EPI_ISL_852794   | Medical center Freiburg | EPI_ISL_852753   | Freiburg area           | EPI_ISL_852807   | Immunosuppressed patient (day 105) |
| EPI_ISL_852791   | Medical center Freiburg | EPI_ISL_852752   | Freiburg area           | EPI_ISL_852805   | Immunosuppressed patient (day 71)  |
| EPI_ISL_852789   | Medical center Freiburg | EPI_ISL_852751   | Freiburg area           | EPI_ISL_852808   | Immunosuppressed patient (day 59)  |
| EPI_ISL_852787   | Medical center Freiburg | EPI_ISL_852750   | Freiburg area           | EPI_ISL_852667   | Immunosuppressed patient (day 14)  |
| EPI_ISL_852734   | Medical center Freiburg | EPI_ISL_852739   | Freiburg area           | EPI_ISL_852659   | Immunosuppressed patient (day 42)  |
| EPI_ISL_852730   | Freiburg area           | EPI_ISL_852736   | Freiburg area           | EPI_ISL_852709   | Immunosuppressed patient (day 0)   |
| EPI_ISL_852780   | Medical center Freiburg | EPI_ISL_852735   | Freiburg area           | EPI_ISL_852671   | Immunosuppressed patient (day 7)   |
| EPI_ISL_852777   | Freiburg area           | EPI_ISL_852768   | Medical center Freiburg |                  |                                    |
| EPI_ISL_852776   | Medical center Freiburg | EPI_ISL_852675   | Medical center Freiburg |                  |                                    |
| EPI_ISL_852728   | Medical center Freiburg | EPI_ISL_852674   | Medical center Freiburg |                  |                                    |
| EPI_ISL_852726   | Medical center Freiburg | EPI_ISL_852767   | Medical center Freiburg |                  |                                    |
| EPI_ISL_852725   | Freiburg area           | EPI_ISL_852673   | Freiburg area           |                  |                                    |
| EPI_ISL_852724   | Freiburg area           | EPI_ISL_852672   | Medical center Freiburg |                  |                                    |
| EPI_ISL_852722   | Medical center Freiburg | EPI_ISL_852669   | Freiburg area           |                  |                                    |
| EPI_ISL_852721   | Medical center Freiburg | EPI_ISL_852764   | Freiburg area           |                  |                                    |

### Supplementary Table 3: Detailed list of GISAID accession numbers of the 250 randomly selected sequences from Germany between February and April 2020.

We gratefully acknowledge the following Authors from the Originating laboratories responsible for obtaining the specimens, as well as the submitting laboratories where the genome data were generated and shared via GISAID, on which this research is based.

All Submitters of data may be contacted directly via [www.gisaid.org](http://www.gisaid.org)

Authors are sorted alphabetically.

| Accession ID                                                                                                                                                                                                                                                                                                                                                                                                                                                                                                                                                                                                                                                                                                                                                                                                                                                                                                                                                                                                                                                                                                                                                                                                                                                                                                                                                                                                                                                                                                                                                                                                                                                                                                                   | Originating Laboratory                                                                                                                      | Submitting Laboratory                                                                                                                       | Authors                                                                                                                                                                                                                                                                                                                      |
|--------------------------------------------------------------------------------------------------------------------------------------------------------------------------------------------------------------------------------------------------------------------------------------------------------------------------------------------------------------------------------------------------------------------------------------------------------------------------------------------------------------------------------------------------------------------------------------------------------------------------------------------------------------------------------------------------------------------------------------------------------------------------------------------------------------------------------------------------------------------------------------------------------------------------------------------------------------------------------------------------------------------------------------------------------------------------------------------------------------------------------------------------------------------------------------------------------------------------------------------------------------------------------------------------------------------------------------------------------------------------------------------------------------------------------------------------------------------------------------------------------------------------------------------------------------------------------------------------------------------------------------------------------------------------------------------------------------------------------|---------------------------------------------------------------------------------------------------------------------------------------------|---------------------------------------------------------------------------------------------------------------------------------------------|------------------------------------------------------------------------------------------------------------------------------------------------------------------------------------------------------------------------------------------------------------------------------------------------------------------------------|
| EPI_ISL_729516, EPI_ISL_729520, EPI_ISL_729524, EPI_ISL_729525, EPI_ISL_729536, EPI_ISL_729541, EPI_ISL_729546, EPI_ISL_729550                                                                                                                                                                                                                                                                                                                                                                                                                                                                                                                                                                                                                                                                                                                                                                                                                                                                                                                                                                                                                                                                                                                                                                                                                                                                                                                                                                                                                                                                                                                                                                                                 | A. Krumbholz, Labor Dr. Krause und Kollegen MVZ GmbH, Kiel                                                                                  | Charité Universitätsmedizin Berlin, Institut für Virologie                                                                                  | Barbara Mühlemann; Christian Drosten; Julia Schneider; Jörn Beheim-Schwarzbach; Talitha Veith; Terry Jones; Victor M. Corman                                                                                                                                                                                                 |
| see above                                                                                                                                                                                                                                                                                                                                                                                                                                                                                                                                                                                                                                                                                                                                                                                                                                                                                                                                                                                                                                                                                                                                                                                                                                                                                                                                                                                                                                                                                                                                                                                                                                                                                                                      | Bundeswehr Institute of Microbiology                                                                                                        | Bundeswehr Institute of Microbiology                                                                                                        | Alexandra Rehn; Enrico Georgi; Malena Bestehorn-Willmann; Markus Antwerpen; Markus H. Antwerpen and Roman Wölfel; Mathias C. Walter; Mathias Walter; Roman Wölfel; Sabine Zange                                                                                                                                              |
| EPI_ISL_414521, EPI_ISL_732554, EPI_ISL_732555                                                                                                                                                                                                                                                                                                                                                                                                                                                                                                                                                                                                                                                                                                                                                                                                                                                                                                                                                                                                                                                                                                                                                                                                                                                                                                                                                                                                                                                                                                                                                                                                                                                                                 | Center of Medical Microbiology, Virology, and Hospital Hygiene, University of Dusseldorf                                                    | Center of Medical Microbiology, Virology, and Hospital Hygiene, University of Dusseldorf                                                    | Alexander Dilthey; Andreas Walker; Björn-Erik Jensen; Daniel Strelow; Detlef Kidgen-Milles; Hendrik Streeck; Jessica Nicolai; Jörg Timm; Klaus Pfeffer; Malte Kohns Vasconcelos; Marco Andree; Marek Korenca; Maximilian Damagnez; Ortwin Adams; Sandra Hauka; Tina Senff; Tobias Wienemann; Torsten Feldt; Torsten Houwaart |
| EPI_ISL_414508, EPI_ISL_417458, EPI_ISL_417468, EPI_ISL_419552, EPI_ISL_425123, EPI_ISL_425125, EPI_ISL_523934, EPI_ISL_523940, EPI_ISL_523945, EPI_ISL_523949                                                                                                                                                                                                                                                                                                                                                                                                                                                                                                                                                                                                                                                                                                                                                                                                                                                                                                                                                                                                                                                                                                                                                                                                                                                                                                                                                                                                                                                                                                                                                                 | Charité Universitätsmedizin Berlin, Institut für Virologie/Labor Berlin                                                                     | Charité Universitätsmedizin Berlin, Institut für Virologie/Labor Berlin                                                                     | Barbara Mühlemann; Christian Drosten; Julia Schneider; Jörn Beheim-Schwarzbach; Talitha Veith; Terry Jones; Victor M. Corman                                                                                                                                                                                                 |
| see above                                                                                                                                                                                                                                                                                                                                                                                                                                                                                                                                                                                                                                                                                                                                                                                                                                                                                                                                                                                                                                                                                                                                                                                                                                                                                                                                                                                                                                                                                                                                                                                                                                                                                                                      | Charité Universitätsmedizin Berlin, Institut für Virologie/Labor Berlin                                                                     | Charité Universitätsmedizin Berlin, Institut für Virologie/Labor Berlin                                                                     | Barbara Mühlemann; Christian Drosten; Cornelia Schlee; Julia Schneider; Jörn Beheim-Schwarzbach; Talitha Veith; Terry Jones; Tomasz Zemojtel; Victor M. Corman                                                                                                                                                               |
| EPI_ISL_729477, EPI_ISL_729489, EPI_ISL_729491, EPI_ISL_729514, EPI_ISL_729530, EPI_ISL_753798, EPI_ISL_753811, EPI_ISL_753924, EPI_ISL_753937, EPI_ISL_753942, EPI_ISL_754026, EPI_ISL_754028, EPI_ISL_754034, EPI_ISL_754041, EPI_ISL_754046, EPI_ISL_754050, EPI_ISL_806528, EPI_ISL_806530, EPI_ISL_806532, EPI_ISL_806533, EPI_ISL_806539                                                                                                                                                                                                                                                                                                                                                                                                                                                                                                                                                                                                                                                                                                                                                                                                                                                                                                                                                                                                                                                                                                                                                                                                                                                                                                                                                                                 | Department of Infection Prevention and Infectious Diseases, University Hospital Regensburg                                                  | University Hospital Regensburg                                                                                                              | Fritsch, J.; Holzmann, T.; Schneider-Brachert, W.                                                                                                                                                                                                                                                                            |
| see above                                                                                                                                                                                                                                                                                                                                                                                                                                                                                                                                                                                                                                                                                                                                                                                                                                                                                                                                                                                                                                                                                                                                                                                                                                                                                                                                                                                                                                                                                                                                                                                                                                                                                                                      | Department of Infection Prevention and Infectious Diseases, University Hospital Regensburg                                                  | University Hospital Regensburg                                                                                                              | Fritsch, J.; Holzmann, T.; Schneider-Brachert, W.                                                                                                                                                                                                                                                                            |
| EPI_ISL_602282, EPI_ISL_602288, EPI_ISL_602293, EPI_ISL_602294                                                                                                                                                                                                                                                                                                                                                                                                                                                                                                                                                                                                                                                                                                                                                                                                                                                                                                                                                                                                                                                                                                                                                                                                                                                                                                                                                                                                                                                                                                                                                                                                                                                                 | Evangelisches Klinikum Bethel, Institut für Laboratoriumsmedizin, Mikrobiologie und Hygiene                                                 | Bielefeld University                                                                                                                        | Alexander Sczyrba; Christiane Scherer; David Brandt; Jörn Kalinowski; Levin-Joe Klages; Marina Simunovic; Markus Haak; Svenja Vinke; Tobias Busche                                                                                                                                                                           |
| EPI_ISL_883163, EPI_ISL_883164, EPI_ISL_883167                                                                                                                                                                                                                                                                                                                                                                                                                                                                                                                                                                                                                                                                                                                                                                                                                                                                                                                                                                                                                                                                                                                                                                                                                                                                                                                                                                                                                                                                                                                                                                                                                                                                                 | Hannover Medical School, Institute of Virology                                                                                              | Hannover Medical School, Institute of Virology                                                                                              | Jasper Götting; Lars Steinbrück                                                                                                                                                                                                                                                                                              |
| EPI_ISL_602469, EPI_ISL_602470, EPI_ISL_602471, EPI_ISL_602474, EPI_ISL_602475, EPI_ISL_602476, EPI_ISL_602479, EPI_ISL_602482, EPI_ISL_602485, EPI_ISL_602488, EPI_ISL_602498, EPI_ISL_602504, EPI_ISL_602505, EPI_ISL_602506, EPI_ISL_602507, EPI_ISL_602519, EPI_ISL_602524, EPI_ISL_626217                                                                                                                                                                                                                                                                                                                                                                                                                                                                                                                                                                                                                                                                                                                                                                                                                                                                                                                                                                                                                                                                                                                                                                                                                                                                                                                                                                                                                                 | Institute for Virology, University Hospital Essen                                                                                           | Center of Medical Microbiology, Virology, and Hospital Hygiene, University of Dusseldorf                                                    | Alexander Dilthey; Andreas Walker; Daniel Strelow; Jessica Nicolai; Jörg Timm; Klaus Pfeffer; Lisanna Hülse; Malte Kohns Vasconcelos; Maximilian Damagnez; Nadine Lübke; Olympia E. Anastasiou; Tobias Wienemann; Torsten Houwaart; Ulf Dittmer                                                                              |
| see above                                                                                                                                                                                                                                                                                                                                                                                                                                                                                                                                                                                                                                                                                                                                                                                                                                                                                                                                                                                                                                                                                                                                                                                                                                                                                                                                                                                                                                                                                                                                                                                                                                                                                                                      | Institute for Virology, University Hospital Essen                                                                                           | Center of Medical Microbiology, Virology, and Hospital Hygiene, University of Dusseldorf                                                    | Alexander Dilthey; Andreas Walker; Daniel Strelow; Jessica Nicolai; Jörg Timm; Klaus Pfeffer; Lisanna Hülse; Malte Kohns Vasconcelos; Maximilian Damagnez; Nadine Lübke; Olympia E. Anastasiou; Tobias Wienemann; Torsten Houwaart; Ulf Dittmer                                                                              |
| EPI_ISL_525473                                                                                                                                                                                                                                                                                                                                                                                                                                                                                                                                                                                                                                                                                                                                                                                                                                                                                                                                                                                                                                                                                                                                                                                                                                                                                                                                                                                                                                                                                                                                                                                                                                                                                                                 | Institute of Clinical Microbiology and Hygiene, University Hospital Regensburg                                                              | Institute of Clinical Microbiology and Hygiene, University Hospital Regensburg                                                              | Hiergeist, A.                                                                                                                                                                                                                                                                                                                |
| EPI_ISL_723077, EPI_ISL_723107, EPI_ISL_723114, EPI_ISL_723115                                                                                                                                                                                                                                                                                                                                                                                                                                                                                                                                                                                                                                                                                                                                                                                                                                                                                                                                                                                                                                                                                                                                                                                                                                                                                                                                                                                                                                                                                                                                                                                                                                                                 | Institute of Medical Genetics and Applied Genomics                                                                                          | Institute of Medical Genetics and Applied Genomics                                                                                          | Angel Angelov; Caspar Gross; Daniela Bezdán; Michael Bitzer; Michael Sonnabend; Michaela Pogoda; Nicolas Casadei; Siri Göpel; Stephan Ossowski; Thomas Iftner; Tina Ganzenmüller                                                                                                                                             |
| EPI_ISL_983571, EPI_ISL_983574, EPI_ISL_983578, EPI_ISL_983580, EPI_ISL_983581, EPI_ISL_983582, EPI_ISL_983587                                                                                                                                                                                                                                                                                                                                                                                                                                                                                                                                                                                                                                                                                                                                                                                                                                                                                                                                                                                                                                                                                                                                                                                                                                                                                                                                                                                                                                                                                                                                                                                                                 | Institute of Virology, University Hospital, University of Bonn and German Center for Infection Research (DZIF), Bonn-Cologne, Bonn, Germany | Institute of Virology, University Hospital, University of Bonn and German Center for Infection Research (DZIF), Bonn-Cologne, Bonn, Germany | Marek Korenca et al                                                                                                                                                                                                                                                                                                          |
| see above                                                                                                                                                                                                                                                                                                                                                                                                                                                                                                                                                                                                                                                                                                                                                                                                                                                                                                                                                                                                                                                                                                                                                                                                                                                                                                                                                                                                                                                                                                                                                                                                                                                                                                                      | Institute of Virology, University Hospital, University of Bonn and German Center for Infection Research (DZIF), Bonn-Cologne, Bonn, Germany | Institute of Virology, University Hospital, University of Bonn and German Center for Infection Research (DZIF), Bonn-Cologne, Bonn, Germany | Marek Korenca et al                                                                                                                                                                                                                                                                                                          |
| EPI_ISL_763086                                                                                                                                                                                                                                                                                                                                                                                                                                                                                                                                                                                                                                                                                                                                                                                                                                                                                                                                                                                                                                                                                                                                                                                                                                                                                                                                                                                                                                                                                                                                                                                                                                                                                                                 | Jena University Hospital, Institute for Infectious Diseases and Infection Control                                                           | Institute of infectious medicine & hospital hygiene, CaSe-Group                                                                             | Brandt; Christian; Marquet; Matthias W.; Mike; Pleitz; Riccardo; Spott                                                                                                                                                                                                                                                       |
| EPI_ISL_631300                                                                                                                                                                                                                                                                                                                                                                                                                                                                                                                                                                                                                                                                                                                                                                                                                                                                                                                                                                                                                                                                                                                                                                                                                                                                                                                                                                                                                                                                                                                                                                                                                                                                                                                 | MVZ DIAMEDIS Diagnostische Medizin SenneStadt GmbH                                                                                          | Bielefeld University                                                                                                                        | Alexander Sczyrba; Christiane Scherer; David Brandt; Jörn Kalinowski; Levin-Joe Klages; Marina Simunovic; Markus Haak; Svenja Vinke; Tobias Busche                                                                                                                                                                           |
| EPI_ISL_640223, EPI_ISL_640226, EPI_ISL_640228, EPI_ISL_640236, EPI_ISL_640247, EPI_ISL_640252, EPI_ISL_640253, EPI_ISL_640261                                                                                                                                                                                                                                                                                                                                                                                                                                                                                                                                                                                                                                                                                                                                                                                                                                                                                                                                                                                                                                                                                                                                                                                                                                                                                                                                                                                                                                                                                                                                                                                                 | MVZ Laborärzte Singen                                                                                                                       | MVZ Laborärzte Singen                                                                                                                       | Folker Wenzel; Frithjof Blessing; Jonas Schmidt; Sandro Berghaus                                                                                                                                                                                                                                                             |
| see above                                                                                                                                                                                                                                                                                                                                                                                                                                                                                                                                                                                                                                                                                                                                                                                                                                                                                                                                                                                                                                                                                                                                                                                                                                                                                                                                                                                                                                                                                                                                                                                                                                                                                                                      | MVZ Laborärzte Singen                                                                                                                       | MVZ Laborärzte Singen                                                                                                                       | Folker Wenzel; Frithjof Blessing; Jonas Schmidt; Sandro Berghaus                                                                                                                                                                                                                                                             |
| EPI_ISL_420899, EPI_ISL_420901, EPI_ISL_420902, EPI_ISL_420907, EPI_ISL_420912                                                                                                                                                                                                                                                                                                                                                                                                                                                                                                                                                                                                                                                                                                                                                                                                                                                                                                                                                                                                                                                                                                                                                                                                                                                                                                                                                                                                                                                                                                                                                                                                                                                 | Max von Pettenkofer Institute, Virology, National Reference Center for Retroviruses, LMU Munich                                             | Laboratory for Functional Genome Analysis, Dept. Genomics, Gene Center of the LMU Munich                                                    | Alexander Graf; Ashok Varadharajan; Helmut Blum; Max Muenchhoff; Oliver Keppler; Stefan Krebs                                                                                                                                                                                                                                |
| EPI_ISL_437215, EPI_ISL_437217, EPI_ISL_437221, EPI_ISL_437241, EPI_ISL_437245, EPI_ISL_437248, EPI_ISL_437249, EPI_ISL_437260, EPI_ISL_437266, EPI_ISL_437270, EPI_ISL_437271, EPI_ISL_437272, EPI_ISL_437274, EPI_ISL_437276, EPI_ISL_437278, EPI_ISL_437283, EPI_ISL_437287, EPI_ISL_437290, EPI_ISL_437292, EPI_ISL_437295, EPI_ISL_451944, EPI_ISL_466888, EPI_ISL_466892                                                                                                                                                                                                                                                                                                                                                                                                                                                                                                                                                                                                                                                                                                                                                                                                                                                                                                                                                                                                                                                                                                                                                                                                                                                                                                                                                 | Max von Pettenkofer Institute, Virology, National Reference Center for Retroviruses, LMU München                                            | Laboratory for Functional Genome Analysis, Dept. Genomics, Gene Center of the LMU Munich                                                    | Alexander Graf; Helmut Blum; Max Muenchhoff; Oliver Keppler; Stefan Krebs                                                                                                                                                                                                                                                    |
| see above                                                                                                                                                                                                                                                                                                                                                                                                                                                                                                                                                                                                                                                                                                                                                                                                                                                                                                                                                                                                                                                                                                                                                                                                                                                                                                                                                                                                                                                                                                                                                                                                                                                                                                                      | Max von Pettenkofer Institute, Virology, National Reference Center for Retroviruses, LMU München                                            | Laboratory for Functional Genome Analysis, Dept. Genomics, Gene Center of the LMU Munich                                                    | Alexander Graf; Helmut Blum; Max Muenchhoff; Oliver Keppler; Stefan Krebs                                                                                                                                                                                                                                                    |
| EPI_ISL_490205, EPI_ISL_490207                                                                                                                                                                                                                                                                                                                                                                                                                                                                                                                                                                                                                                                                                                                                                                                                                                                                                                                                                                                                                                                                                                                                                                                                                                                                                                                                                                                                                                                                                                                                                                                                                                                                                                 | München Klinik Schwabing                                                                                                                    | MGZ Medical Genetics Center                                                                                                                 | Dieter A. Wolf; Elke Holinski-Feder                                                                                                                                                                                                                                                                                          |
| EPI_ISL_887331, EPI_ISL_887335, EPI_ISL_887353, EPI_ISL_887354, EPI_ISL_887357, EPI_ISL_887360, EPI_ISL_887369, EPI_ISL_887370, EPI_ISL_887379, EPI_ISL_887386, EPI_ISL_887395, EPI_ISL_887397, EPI_ISL_887400, EPI_ISL_887403, EPI_ISL_887415                                                                                                                                                                                                                                                                                                                                                                                                                                                                                                                                                                                                                                                                                                                                                                                                                                                                                                                                                                                                                                                                                                                                                                                                                                                                                                                                                                                                                                                                                 | Protzer Lab                                                                                                                                 | Protzer Lab, Gagneur Lab, Robert Koch Institut                                                                                              | Aleksandar Radonic; Alexander Karollus; Andrea Theumer; Dieter Hoffmann; Eva Schulte; Julien Gagneur; Max von Kleist; Oliver Drechsel; Stephan Fuchs; Ulrike Protzer                                                                                                                                                         |
| see above                                                                                                                                                                                                                                                                                                                                                                                                                                                                                                                                                                                                                                                                                                                                                                                                                                                                                                                                                                                                                                                                                                                                                                                                                                                                                                                                                                                                                                                                                                                                                                                                                                                                                                                      | Protzer Lab                                                                                                                                 | Protzer Lab, Gagneur Lab, Robert Koch Institut                                                                                              | Aleksandar Radonic; Alexander Karollus; Andrea Theumer; Dieter Hoffmann; Eva Schulte; Julien Gagneur; Max von Kleist; Oliver Drechsel; Stephan Fuchs; Ulrike Protzer                                                                                                                                                         |
| EPI_ISL_883179, EPI_ISL_883182, EPI_ISL_883184, EPI_ISL_883188                                                                                                                                                                                                                                                                                                                                                                                                                                                                                                                                                                                                                                                                                                                                                                                                                                                                                                                                                                                                                                                                                                                                                                                                                                                                                                                                                                                                                                                                                                                                                                                                                                                                 | UK Tübingen, Medical Microbiology                                                                                                           | Hannover Medical School, Institute of Virology                                                                                              | Jasper Götting; Lars Steinbrück                                                                                                                                                                                                                                                                                              |
| EPI_ISL_775905, EPI_ISL_775911, EPI_ISL_775914, EPI_ISL_775918, EPI_ISL_775941, EPI_ISL_775944, EPI_ISL_775949, EPI_ISL_775958, EPI_ISL_775967, EPI_ISL_775968, EPI_ISL_775974, EPI_ISL_775977, EPI_ISL_775979, EPI_ISL_775983, EPI_ISL_775996, EPI_ISL_775998, EPI_ISL_776002, EPI_ISL_776017, EPI_ISL_776020, EPI_ISL_776035, EPI_ISL_776038, EPI_ISL_776040, EPI_ISL_776048, EPI_ISL_776061, EPI_ISL_776066, EPI_ISL_776070, EPI_ISL_776076, EPI_ISL_776079, EPI_ISL_776082, EPI_ISL_776087, EPI_ISL_776093, EPI_ISL_776094, EPI_ISL_776095, EPI_ISL_776100, EPI_ISL_776103, EPI_ISL_776105, EPI_ISL_776106, EPI_ISL_776108, EPI_ISL_776122, EPI_ISL_776123, EPI_ISL_776125, EPI_ISL_776127, EPI_ISL_776134, EPI_ISL_776140, EPI_ISL_776157, EPI_ISL_776160, EPI_ISL_776170, EPI_ISL_776172, EPI_ISL_776178, EPI_ISL_776191, EPI_ISL_776192, EPI_ISL_776193, EPI_ISL_776201, EPI_ISL_776214, EPI_ISL_776227, EPI_ISL_776230, EPI_ISL_776231, EPI_ISL_776237, EPI_ISL_776242, EPI_ISL_776246, EPI_ISL_776253, EPI_ISL_776254, EPI_ISL_776257, EPI_ISL_776258, EPI_ISL_776260, EPI_ISL_776261, EPI_ISL_776262, EPI_ISL_776266, EPI_ISL_776270, EPI_ISL_776275, EPI_ISL_776286, EPI_ISL_776292, EPI_ISL_776293, EPI_ISL_776295, EPI_ISL_776312, EPI_ISL_776313, EPI_ISL_776315, EPI_ISL_776317, EPI_ISL_776320, EPI_ISL_776322, EPI_ISL_776326, EPI_ISL_776340, EPI_ISL_776345, EPI_ISL_776355, EPI_ISL_776360, EPI_ISL_776395, EPI_ISL_776397, EPI_ISL_776410, EPI_ISL_776411, EPI_ISL_776424, EPI_ISL_776427, EPI_ISL_776434, EPI_ISL_776454, EPI_ISL_776473, EPI_ISL_776474, EPI_ISL_776478, EPI_ISL_776481, EPI_ISL_776491, EPI_ISL_776493, EPI_ISL_776501, EPI_ISL_776505, EPI_ISL_776507, EPI_ISL_776515, EPI_ISL_776557 | University Medical Center Hamburg Eppendorf                                                                                                 | Heinrich Pette Institute, Leibniz Institute for Experimental Virology                                                                       |                                                                                                                                                                                                                                                                                                                              |
| see above                                                                                                                                                                                                                                                                                                                                                                                                                                                                                                                                                                                                                                                                                                                                                                                                                                                                                                                                                                                                                                                                                                                                                                                                                                                                                                                                                                                                                                                                                                                                                                                                                                                                                                                      | University Medical Center Hamburg Eppendorf                                                                                                 | Heinrich Pette Institute, Leibniz Institute for Experimental Virology                                                                       | Adam Grundhoff; Alexis Robitaille; Johannes Knobloch; Martin Aepfelbacher; Nicole Fischer; Thomas Günther                                                                                                                                                                                                                    |
